# Supplementary material for: Genomic evidence for recurrent genetic admixture during the domestication of Mediterranean olive trees (Olea europaea L.)
Source: PubMed Central journal article supplement (PMC7586694; doi:10.1186/s12915-020-00881-6), 2020-10-26

Figure S1

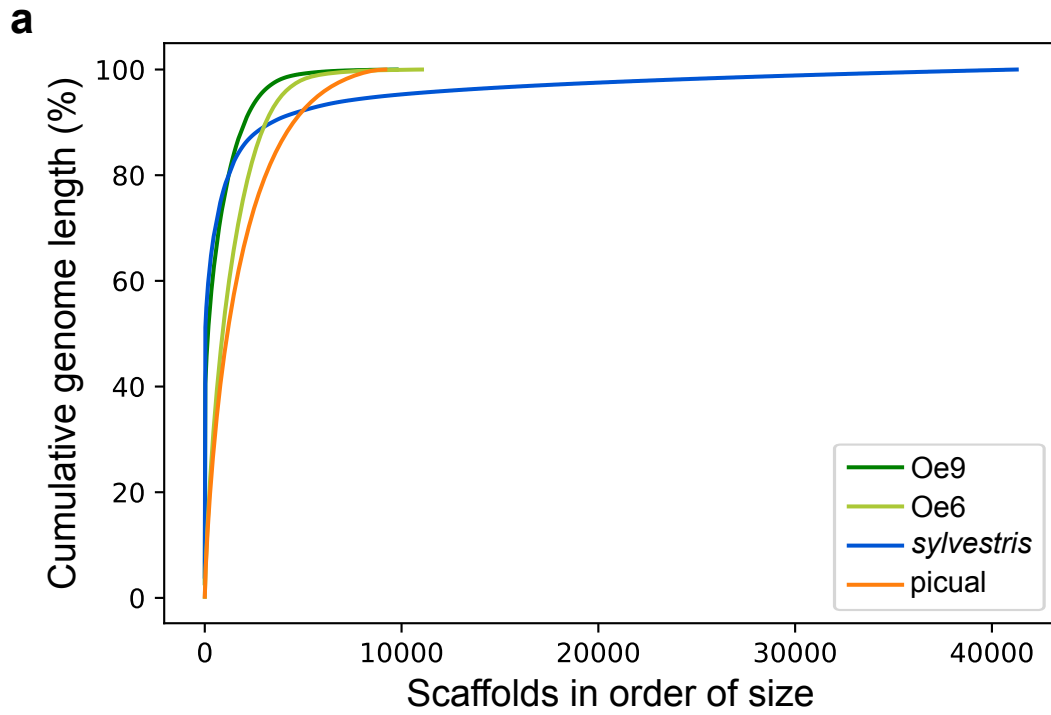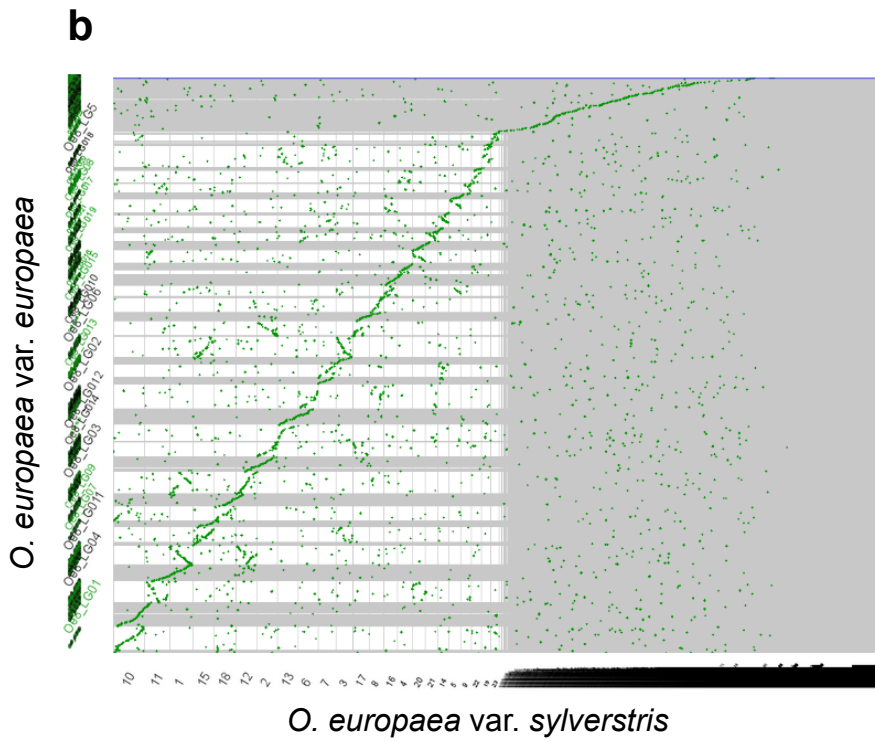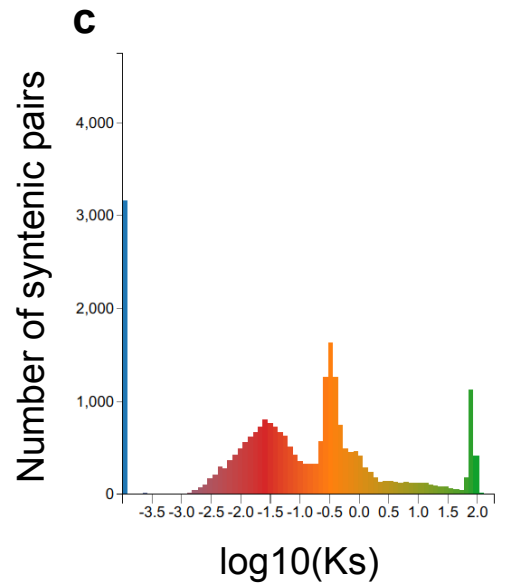

Figure S2

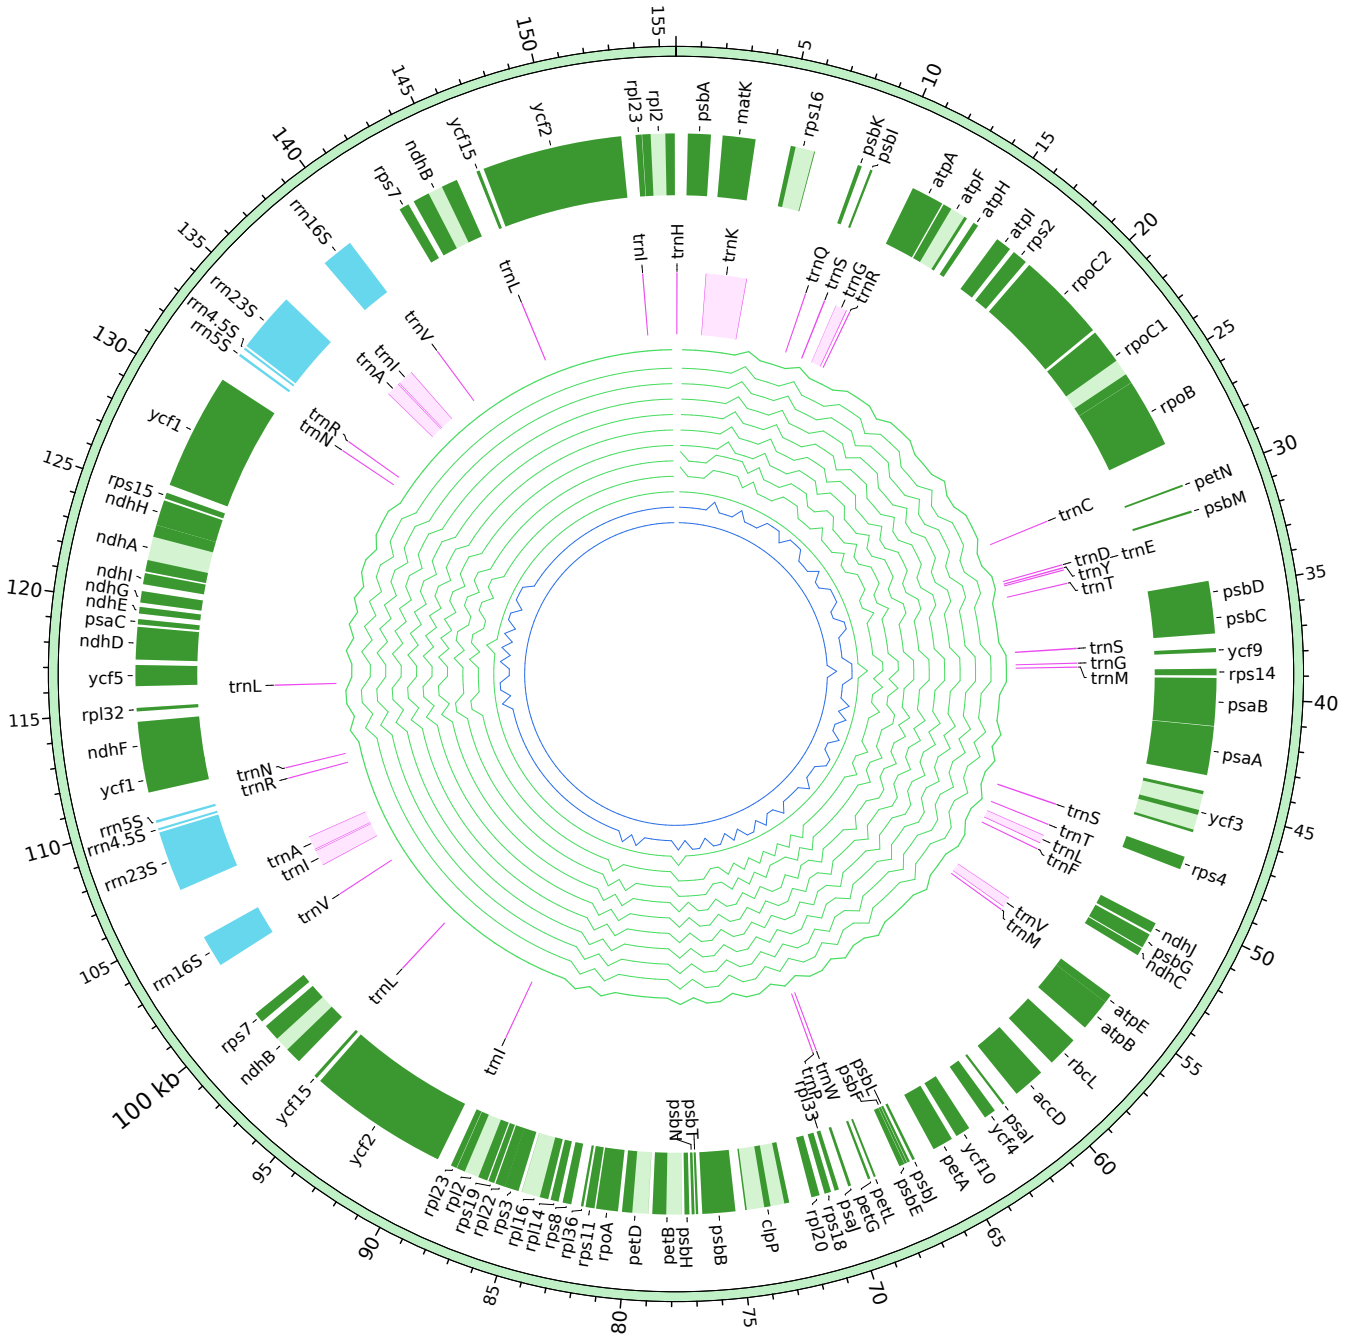



Figure S4

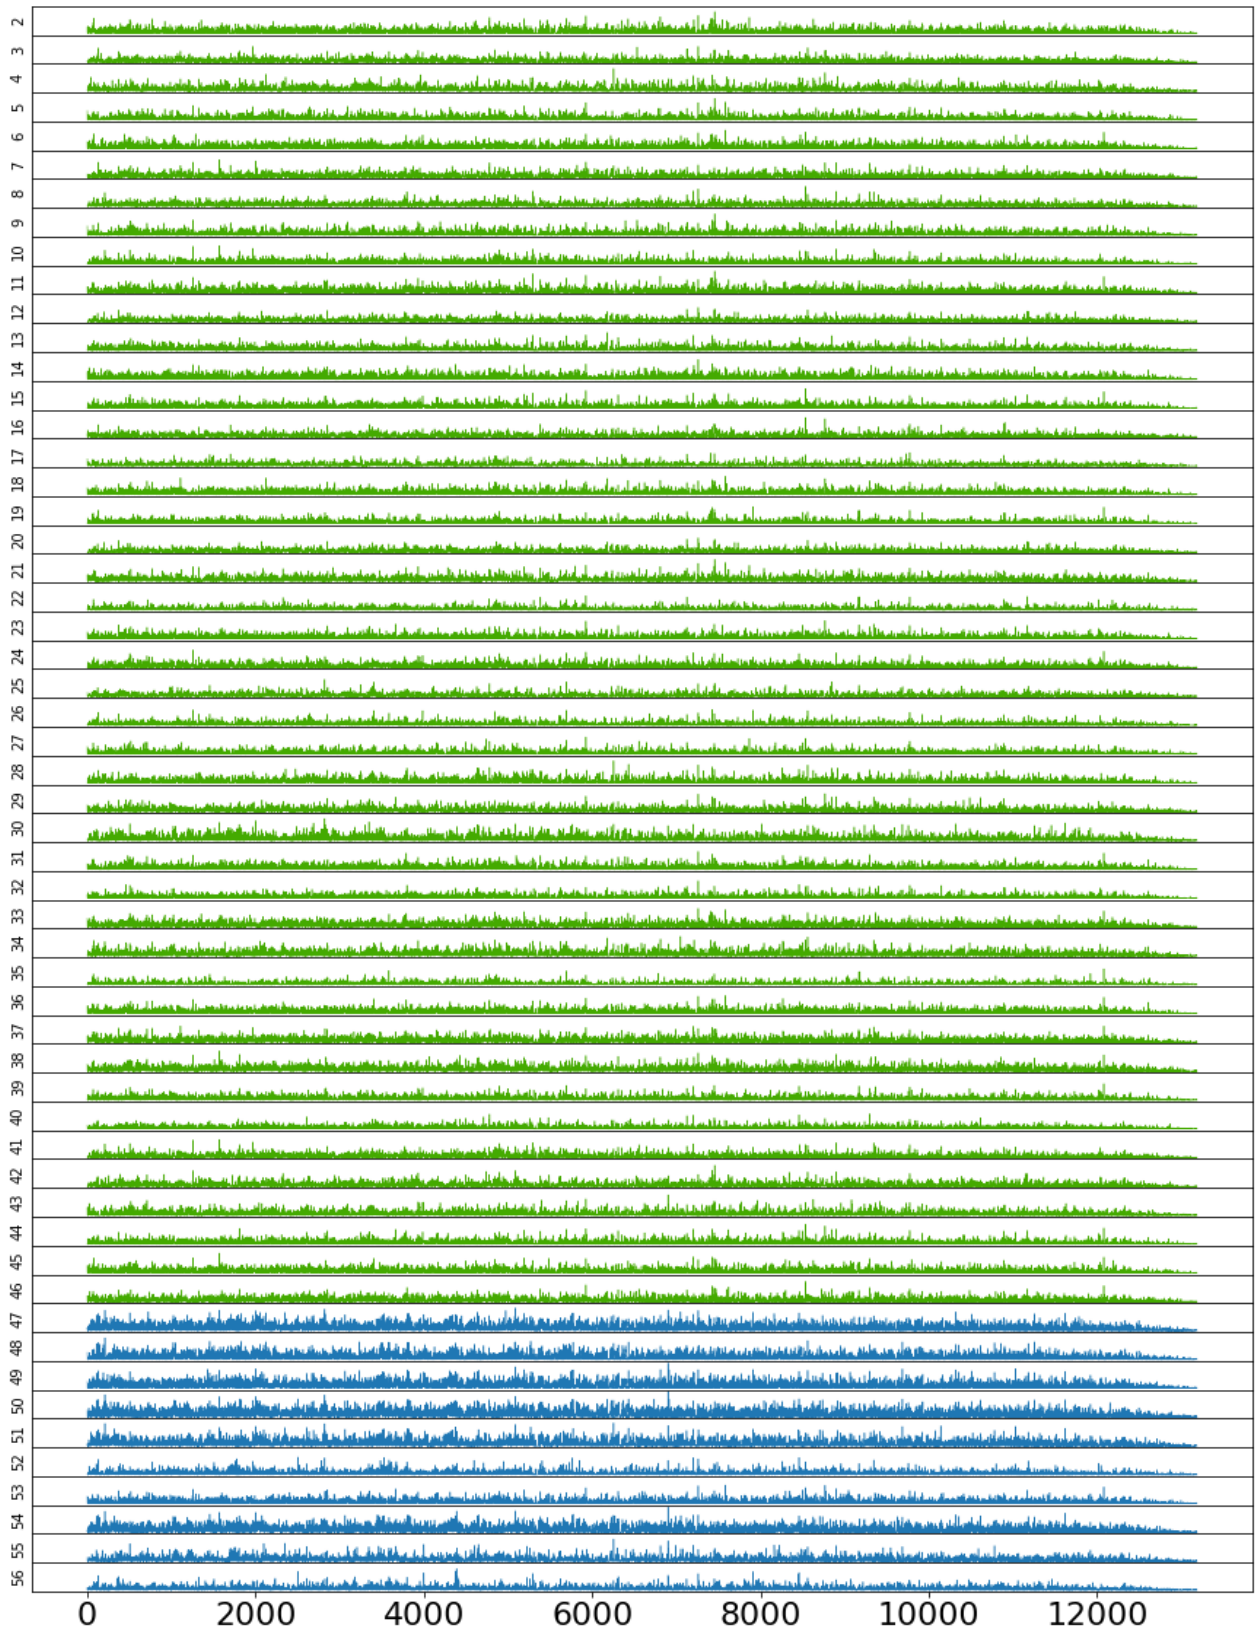

|                        |                            |                                   |                            |                 |
|------------------------|----------------------------|-----------------------------------|----------------------------|-----------------|
| 2 'Maarri'             | 13 'Ocal'                  | 25 'Piñonera'                     | 37 'Majhol-152'            | 47 W7R224       |
| 3 'Koroneiki'          | 14 'Fishomi'               | 26 'Frantoio'                     | 38 'Mari'                  | 48 W9R302       |
| 4 'Grappolo'           | 15 'Manzanilla de Sevilla' | 27 'Arbequina'                    | 39 'Picual'                | 49 W11R37       |
| 5 'Morrut'             | 16 'Mavreya'               | 28 'Leccino'                      | 40 'Chemlal de Kabilye'    | 50 sylvestris-P |
| 6 'Abou Satl Mohazam'  | 17 'Menya'                 | 29 'Kalamon'                      | 41 'Zarza'                 | 51 W2R74        |
| 7 'Barnea'             | 18 'Uslu'                  | 30 'Dokkar'                       | 42 'Mastoidis'             | 52 W8R225       |
| 8 'Temprano'           | 19 'Lechin de Granada'     | 31 'Majhol-1013'                  | 43 'Klon-14-1812'          | 53 sylvestris-T |
| 9 'Myrtolia'           | 20 'Megaritiki'            | 32 'Manzanillera de Huerca Overa' | 44 'Picudo'                | 54 W3R78        |
| 10 'Lechin de Sevilla' | 21 'Beladi'                | 33 'Jabali'                       | 45 'Abbadi Abou Gabra-842' | 55 W1R198       |
| 11 'Sorani'            | 22 'Forastera de Tortosa'  | 34 'Verdial de Velez-Malaga-1'    | 46 'Barri'                 | 56 W4R183       |
| 12 'Lianolia Kerkyras' | 23 'Royal'                 | 35 'Llumeta'                      |                            |                 |
|                        | 24 'Hojiblanca'            | 36 'Abou Kanani'                  |                            |                 |



Figure S5

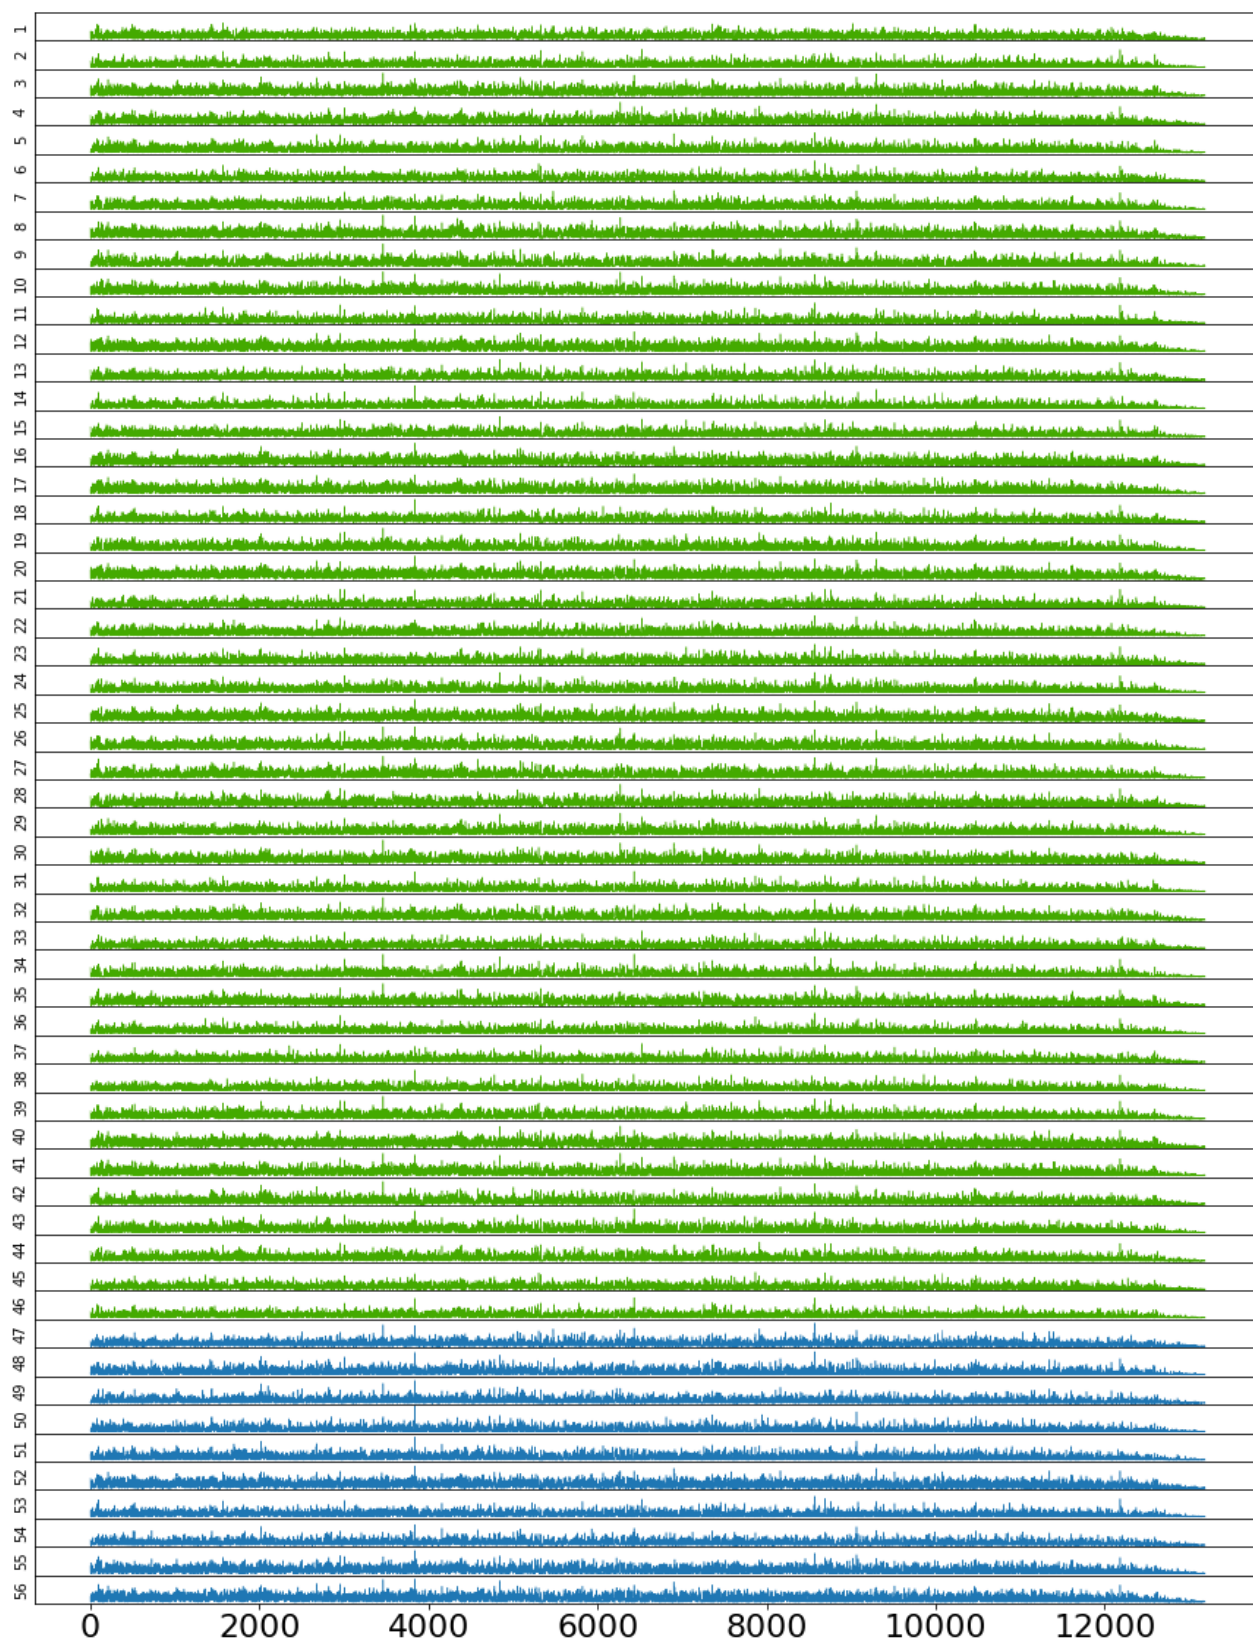

|                        |                            |                                   |                           |                 |
|------------------------|----------------------------|-----------------------------------|---------------------------|-----------------|
| 1 'Farga'              | 13 'Ocal'                  | 25 'Piñonera'                     | 37 'Majhol-152'           | 47 W7R224       |
| 2 'Maarri'             | 14 'Fishomi'               | 26 'Frantoio'                     | 38 'Mari'                 | 48 W9R302       |
| 3 'Koroneiki'          | 15 'Manzanilla de Sevilla' | 27 'Arbequina'                    | 39 'Picual'               | 49 W11R37       |
| 4 'Grappolo'           | 16 'Mavreya'               | 28 'Leccino'                      | 40 'Chemlal de Kabilye'   | 50 sylvestris-P |
| 5 'Morrut'             | 17 'Menya'                 | 29 'Kalamon'                      | 41 'Zarza'                | 51 W2R74        |
| 6 'Abou Satl Mohazam'  | 18 'Uslu'                  | 30 'Dokkar'                       | 42 'Mastoidis'            | 52 W8R225       |
| 7 'Barnea'             | 19 'Lechin de Granada'     | 31 'Majhol-1013'                  | 43 'Klon-14-1812'         | 53 sylvestris-T |
| 8 'Temprano'           | 20 'Megaritiki'            | 32 'Manzanillera de Huerca Overa' | 44 'Picudo'               | 54 W3R78        |
| 9 'Myrtolia'           | 21 'Beladi'                | 33 'Jabali'                       | 45 'Abbad Abou Gabra-842' | 55 W1R198       |
| 10 'Lechin de Sevilla' | 22 'Forastera de Tortosa'  | 34 'Verdial de Velez-Malaga-1'    | 46 'Barri'                | 56 W4R183       |
| 11 'Sorani'            | 23 'Royal'                 | 35 'Llumeta'                      |                           |                 |
| 12 'Lianolia Kerkyras' | 24 'Hojiblanca'            | 36 'Abou Kanani'                  |                           |                 |



Figure S7

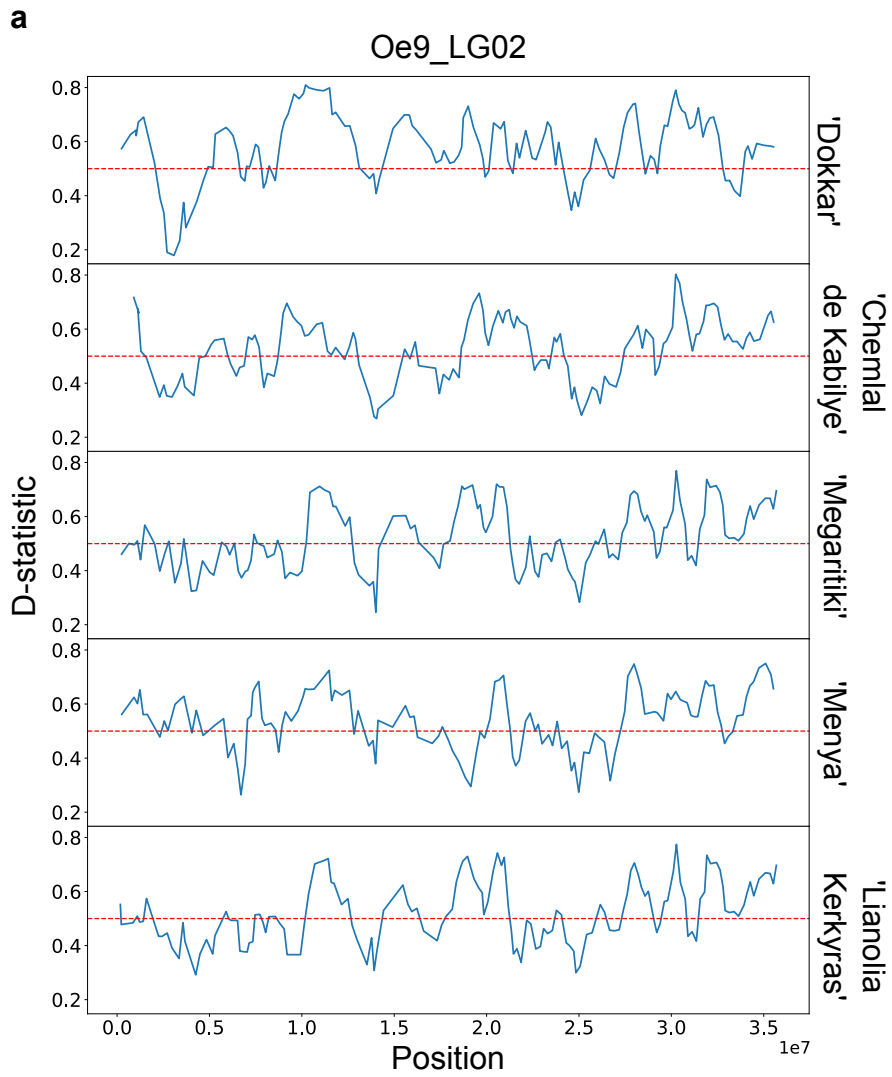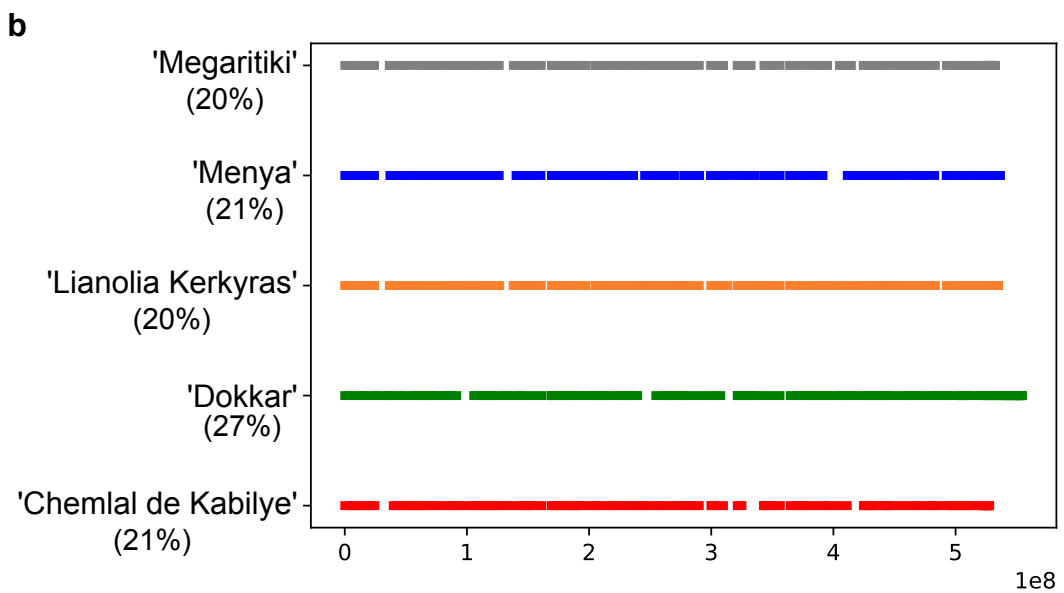

Figure S8

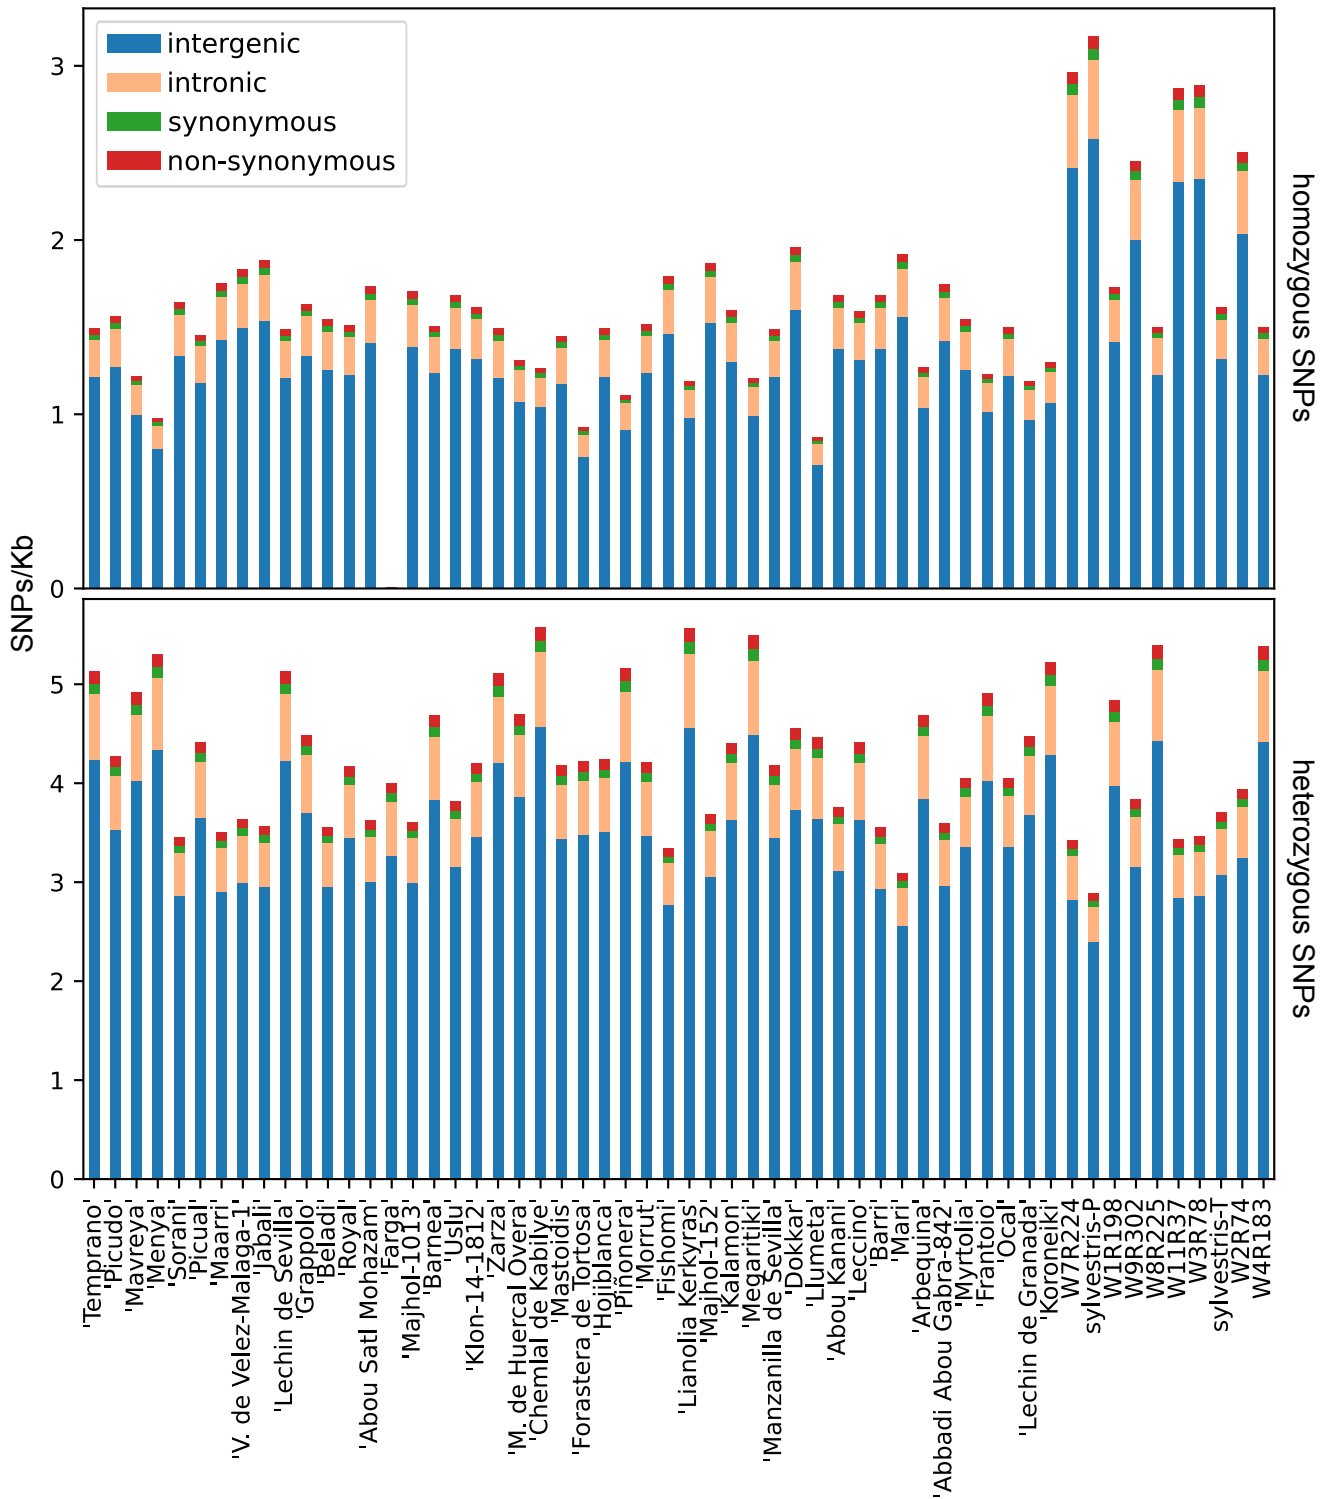



Figure S9

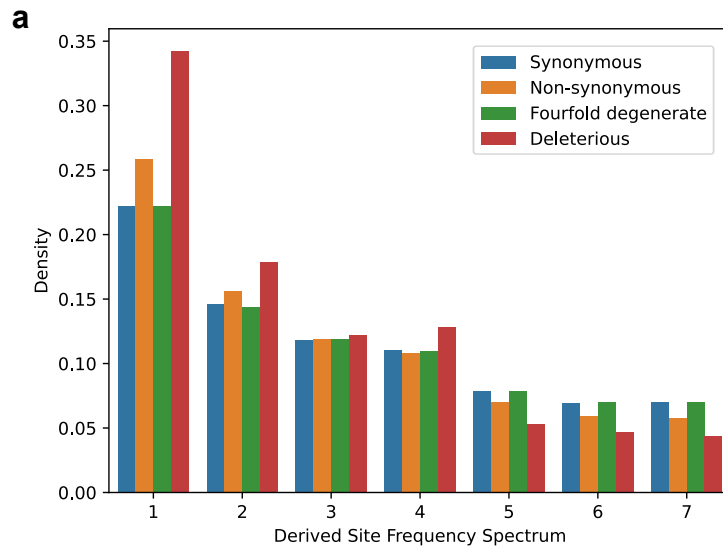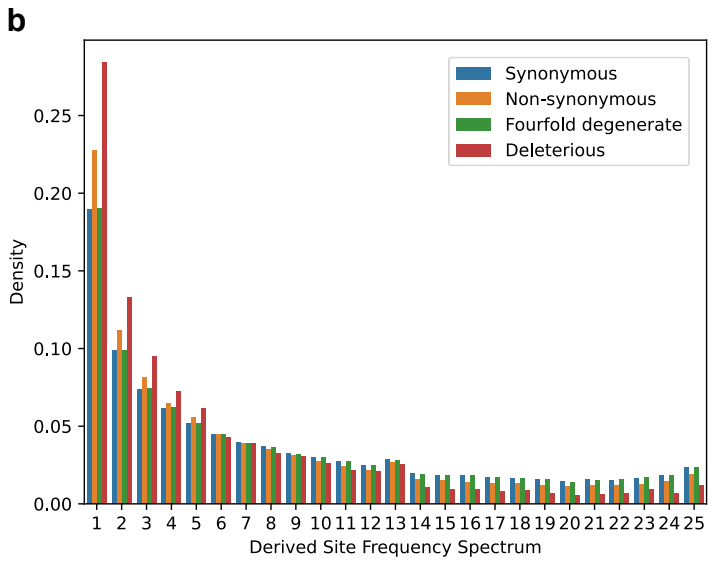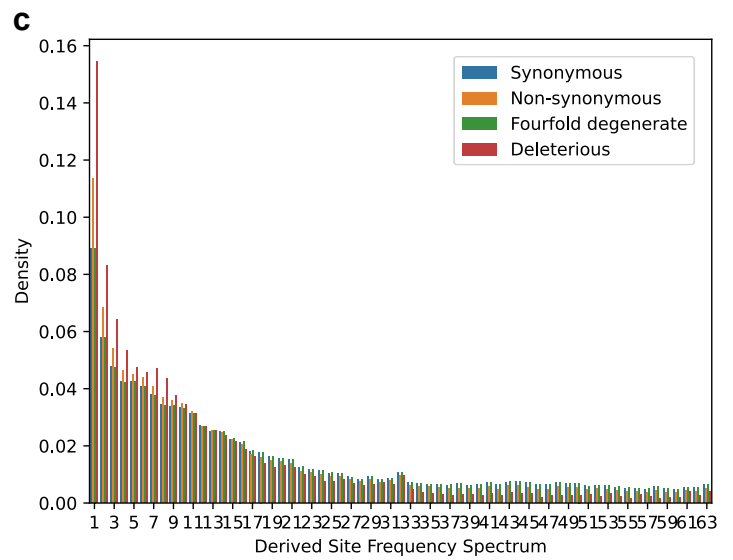

Supplement: 12915_2020_881_MOESM1_ESM.pdf [file 12915_2020_881_MOESM1_ESM.pdf]
